# Supplementary material
Source: PubMed Central journal article supplement (PMC10351394)
Supplement: NIHMS1913020-supplement-Supplementary_Material.pdf [file NIHMS1913020-supplement-Supplementary_Material.pdf]

**Supplementary Table 1** - Odds Ratio for pre-specified outcomes according to trajectory of depressive symptoms in subgroups divided by gender:

| <b>Outcome</b>                      | <b>Male (N = 8,331):<br/>OR (95% CI)</b> | <b>Female (N = 10,779):<br/>OR (95% CI)</b> |
|-------------------------------------|------------------------------------------|---------------------------------------------|
| <b>Any outcome</b>                  |                                          |                                             |
| Non-depressed                       | REF                                      | REF                                         |
| Subthreshold depression             | 1.05 (0.89, 1.23)                        | 1.35 (1.06, 1.34)                           |
| Persistent depression               | 1.83 (1.46, 2.29)                        | 1.99 (1.61, 2.48)                           |
| Emerging depression                 | 1.49 (1.15, 1.93)                        | 1.32 (0.99, 1.76)                           |
| <b>Disability</b>                   |                                          |                                             |
| Non-depressed                       | REF                                      | REF                                         |
| Subthreshold depression             | 1.49 (0.98, 2.26)                        | 2.43 (1.72, 3.42)                           |
| Persistent depression               | 5.73 (3.70, 8.89)                        | 4.17 (2.75, 6.31)                           |
| Emerging depression                 | 2.58 (1.45, 5.59)                        | 2.50 (1.45, 4.31)                           |
| <b>Death</b>                        |                                          |                                             |
| Non-depressed                       | REF                                      | REF                                         |
| Subthreshold depression             | 0.96 (0.79, 1.18)                        | 1.14 (0.91, 1.43)                           |
| Persistent depression               | 1.24(0.91, 1.70)                         | 1.58 (1.51, 2.17)                           |
| Emerging depression                 | 1.35 (0.99, 1.87)                        | 1.09 (0.71, 1.66)                           |
| <b>Cardiovascular disease (CVD)</b> |                                          |                                             |
| Non-depressed                       | REF                                      | REF                                         |
| Subthreshold depression             | 1.14 (0.91, 1.41)                        | 1.09 (0.85, 1.41)                           |
| Persistent depression               | 1.19 (0.83, 1.69)                        | 1.27 (0.86, 1.87)                           |
| Emerging depression                 | 1.21 (0.82, 1.78)                        | 1.40 (0.91, 2.16)                           |
| <b>Dementia</b>                     |                                          |                                             |
| Non-depressed                       | REF                                      | REF                                         |
| Subthreshold depression             | 1.06 (0.80, 1.42)                        | 1.15 (0.88, 1.51)                           |
| Persistent depression               | 1.09 (0.67, 1.78)                        | 1.53 (1.03, 2.26.)                          |

|                         |                         |                      |
|-------------------------|-------------------------|----------------------|
| Emerging depression     | 1.48 (0.94, 2.35)       | 1.29 (0.78, 2.10)    |
| <b>Cancer</b>           |                         |                      |
| Non-depressed           | REF                     | REF                  |
| Subthreshold depression | 1.19 (1.03, 1.37)       | 1.04 (0.88, 1.21)    |
| Persistent depression   | 1.20 (0.95, 1.51)       | 1.21 (0.95, 1.54)    |
| Emerging depression     | 1.53 (1.21, 1.94)       | 1.04 (0.77, 1.39)    |
| <b>Depression</b>       |                         |                      |
| Non-depressed           | REF                     | REF                  |
| Subthreshold depression | 15.58 (12.65, 19.20)    | 13.72 (11.99, 15.70) |
| Persistent depression   | 127.26 (102.10, 158.61) | 76.67 (65.85, 89.27) |
| Emerging depression     | 23.10 (18.38, 29.03)    | 16.31 (14.01, 19.00) |
| <b>Major hemorrhage</b> |                         |                      |
| Non-depressed           | REF                     | REF                  |
| Subthreshold depression | 1.20 (0.92, 1.57)       | 1.28 (0.99, 1.66)    |
| Persistent depression   | 1.65 (1.11, 2.46)       | 1.27 (0.84, 1.93)    |
| Emerging depression     | 2.30 (1.57, 3.37)       | 1.40 (0.89, 2.22)    |

Footnote: Results from logistic regressions using generalized estimating equations (GEEs) with robust variance estimator and within-group exchangeable correlation matrix to account for clustered nature of data. Model was adjusted for age, gender, race, smoking, alcohol consumption, education, and living arrangement.

**Supplementary Table 2** - Odds Ratio for pre-specified outcomes according to trajectory of depressive symptoms in subgroups divided by treatment group (placebo vs aspirin) and antidepressant use.

| Outcome                                 | Placebo group<br>(N = 8,429) | Aspirin group<br>(N=8,359) | Antidepressant use<br>(N = 1,059) | Combination<br>of aspirin and<br>antidepressant<br>(N = 1,065) |
|-----------------------------------------|------------------------------|----------------------------|-----------------------------------|----------------------------------------------------------------|
| <b>Any outcome</b>                      | <b>OR (95% CI)</b>           | <b>OR (95% CI)</b>         | <b>OR (95% CI)</b>                | <b>OR (95% CI)</b>                                             |
| Non-depressed                           | REF                          | REF                        | REF                               | REF                                                            |
| Subthreshold depression                 | 1.03 (0.87, 1.22)            | 1.25 (1.06, 1.49)          | 1.51 (0.93, 2.45)                 | 1.66 (0.97, 2.84)                                              |
| Persistent depression                   | 1.41 (1.07, 1.84)            | 2.21 (1.74, 2.81)          | 2.13 (1.26, 3.60)                 | 2.32 (1.30, 4.15)                                              |
| Emerging depression                     | 1.37 (1.02, 1.84)            | 1.44 (1.07, 1.93)          | 1.26 (0.58, 2.72)                 | 1.75 (0.78, 3.96)                                              |
| <b>Disability</b>                       |                              |                            |                                   |                                                                |
| Non-depressed                           | REF                          | REF                        | REF                               | REF                                                            |
| Subthreshold depression                 | 1.82 (1.25, 2.66)            | 1.98 (1.29, 3.03)          | 1.45 (0.56, 3.73)                 | 3.16 (1.07, 9.37)                                              |
| Persistent depression                   | 4.55 (2.89, 7.15)            | 5.14 (3.09, 8.55)          | 3.38 (1.29, 8.87)                 | 3.58 (1.14, 11.27)                                             |
| Emerging depression                     | 2.59 (1.46, 4.60)            | 2.08 (1.04, 4.14)          | 1.82 (0.44, 7.47)                 | 5.39 (1.42, 20.49)                                             |
| <b>Death</b>                            |                              |                            |                                   |                                                                |
| Non-depressed                           | REF                          | REF                        | REF                               | REF                                                            |
| Subthreshold depression                 | 0.86 (0.68, 1.08)            | 1.15 (0.92, 1.44)          | 1.36 (0.69, 2.67)                 | 1.15 (0.59, 2.22)                                              |
| Persistent depression                   | 0.91 (0.60, 1.39)            | 1.85 (1.34, 2.56)          | 1.52 (0.69, 3.34)                 | 1.09 (0.49, 2.42)                                              |
| Emerging depression                     | 1.22 (0.82, 1.81)            | 1.51 (1.05, 2.16)          | 0.44 (0.11, 1.73)                 | 0.49 (0.10, 2.31)                                              |
| <b>Cardiovascular disease<br/>(CVD)</b> |                              |                            |                                   |                                                                |
| Non-depressed                           | REF                          | REF                        | REF                               | REF                                                            |
| Subthreshold depression                 | 1.13 (0.89, 1.44)            | 1.13 (0.87, 1.46)          | 0.71 (0.34, 1.51)                 | 1.08 (0.53, 2.22)                                              |
| Persistent depression                   | 1.09 (0.71, 1.67)            | 1.30 (0.85, 2.00)          | 0.89 (0.39, 2.01)                 | 1.16 (0.52, 2.59)                                              |
| Emerging depression                     | 1.27 (0.82, 1.98)            | 1.49 (0.99, 2.26)          | 0.98 (0.33, 2.86)                 | 0.28 (0.03, 2.24)                                              |
| <b>Dementia</b>                         |                              |                            |                                   |                                                                |

|                         |                        |                       |                      |                      |
|-------------------------|------------------------|-----------------------|----------------------|----------------------|
| Non-depressed           | REF                    | REF                   | REF                  | REF                  |
| Subthreshold depression | 1.05 (0.78, 1.40)      | 1.15 (0.85, 1.55)     | 1.91 (0.73, 4.99)    | 0.83 (0.28, 2.43)    |
| Persistent depression   | 0.81 (0.45, 1.46)      | 1.40 (0.86, 2.28)     | 2.05 (0.73, 5.69)    | 2.57 (0.94, 7.04)    |
| Emerging depression     | 1.18 (0.69, 2.01)      | 1.38 (0.83, 2.30)     | 2.26 (0.62, 8.19)    | 2.39 (0.64, 8.89)    |
| <b>Cancer</b>           |                        |                       |                      |                      |
| Non-depressed           | REF                    | REF                   | REF                  | REF                  |
| Subthreshold depression | 0.94 (0.80, 1.10)      | 1.26 (1.08, 1.47)     | 0.91 (0.55, 1.49)    | 2.07 (1.19, 3.62)    |
| Persistent depression   | 1.18 (0.90, 1.54)      | 1.38 (1.06, 1.79)     | 0.77 (0.42, 1.43)    | 1.38 (0.70, 2.70)    |
| Emerging depression     | 1.50 (1.15, 1.94)      | 1.33 (1.01, 1.75)     | 0.78 (0.31, 1.92)    | 0.40 (0.08, 1.85)    |
| <b>Depression</b>       |                        |                       |                      |                      |
| Non-depressed           | REF                    | REF                   | REF                  | REF                  |
| Subthreshold depression | 15.47 (12.94, 18.49)   | 13.49 (11.42, 15.94)  | 12.69 (8.07, 19.95)  | 9.15 (6.08, 13.77)   |
| Persistent depression   | 102.58 (84.29, 124.84) | 90.20 (74.55, 109.14) | 58.78 (36.54, 94.55) | 50.76 (33.19, 77.62) |
| Emerging depression     | 20.09 (16.45, 24.55)   | 17.63 (14.59, 21.30)  | 15.03 (9.19, 24.57)  | 11.72 (7.61, 18.06)  |
| <b>Major hemorrhage</b> |                        |                       |                      |                      |
| Non-depressed           | REF                    | REF                   | REF                  | REF                  |
| Subthreshold depression | 1.29 (0.95, 1.76)      | 1.07 (0.82, 1.40)     | 5.16 (1.13, 23.40)   | 1.28 (0.65, 2.52)    |
| Persistent depression   | 1.43 (0.85, 2.41)      | 1.09 (0.68, 1.73)     | 7.26 (1.57, 33.49)   | 1.19 (0.53, 2.65)    |
| Emerging depression     | 2.17 (1.36, 3.46)      | 1.34 (0.86, 2.09)     | 8.92 (1.71, 46.48)   | 1.92 (0.75, 4.93)    |

Footnote: Results from logistic regressions using generalized estimating equations (GEEs) with robust variance estimator and within-group exchangeable correlation matrix to account for clustered nature of data. Model was adjusted for age, gender, race, smoking, alcohol consumption, education, and living arrangement.

# Placebo and Aspirin sub-groups exclude users of antidepressant medication, individually investigated as shown in Supplement Table 4.

**Supplementary Table 3:** Model diagnosis and posterior classification data:

| Number of trajectories                                                                                     | Number of parameters | Log-likelihood | AIC    | BIC     | Entropy | % in class1 | % in class2 | % in class3 | % in class4 | % in class5 |
|------------------------------------------------------------------------------------------------------------|----------------------|----------------|--------|---------|---------|-------------|-------------|-------------|-------------|-------------|
| <b><i>Best performing models with non-linear spline link function for each number for trajectories</i></b> |                      |                |        |         |         |             |             |             |             |             |
| 1                                                                                                          | 14                   | -21313         | 442654 | 4427638 | 1.00    | 100.0       | NA          | NA          | NA          | NA          |
| 2                                                                                                          | 19                   | -215959        | 431955 | 432105  | 0.44    | 33.8        | 66.2        | NA          | NA          | NA          |
| 3                                                                                                          | 22                   | -215879        | 431801 | 431974  | 0.57    | 65.8        | 2.0         | 32.2        | NA          | NA          |
| 4                                                                                                          | 25                   | -215827        | 431704 | 431900  | 0.49    | 39.0        | 9.3         | 6.6         | 45.5        | NA          |
| 5                                                                                                          | 28                   | -215828        | 431712 | 431932  | 0.42    | 10.1        | 9.5         | 10.4        | 52.5        | 17.6        |
| <b><i>Best performing models with linear link function for each number for trajectories</i></b>            |                      |                |        |         |         |             |             |             |             |             |
| 1                                                                                                          | 11                   | -247212        | 494446 | 494532  | 1.00    | 100.0       | NA          | NA          | NA          | NA          |
| 2                                                                                                          | 14                   | -245495        | 491018 | 491128  | 0.86    | 9.0         | 91.0        | NA          | NA          | NA          |
| 3                                                                                                          | 17                   | -245525        | 491084 | 491218  | 0.42    | 9.3         | 90.7        | 0.0         | NA          | NA          |
| 4                                                                                                          | 20                   | -243903        | 487847 | 488004  | 0.86    | 80.8        | 6.9         | 1.9         | 10.3        | NA          |
| 5                                                                                                          | 23                   | -245495        | 491035 | 491216  | 0.25    | 0.0         | 0.6         | 12.4        | 87.0        | 0.0         |

AIC, Akaike information criterion; BIC, Bayesian information criterion.

Entropy is used to measure accuracy of classification ranging from 0 to 1, with higher values of entropy indicating better classification. The AIC and BIC provide information on how well each model fit the data, with lower values indicating better model fit (reference). Log-likelihood represents the combination of model parameter values that maximize the probability of drawing the sample obtained (reference) with larger Log-likelihood indicating better consistency between model and obtained data.

**Supplementary Table 4.** Posterior classification probabilities and posterior probabilities above 60%, 80%, and 90% thresholds for the selected model.

|                                                         | <b>Class 1</b> | <b>Class 2</b> | <b>Class 3</b> | <b>Class 4</b> |
|---------------------------------------------------------|----------------|----------------|----------------|----------------|
| <b><i>Posterior classification probabilities</i></b>    |                |                |                |                |
| Class 1 membership probability                          | 61             | 21             | 28             | 13             |
| Class 2 membership probability                          | 9              | 72             | 5              | 0              |
| Class 3 membership probability                          | 17             | 7              | 55             | 62             |
| Class 4 membership probability                          | 13             | 0              | 12             | 81             |
| <b><i>Posterior probabilities above a threshold</i></b> |                |                |                |                |
| Class membership probability >70%                       | 23             | 58             | 12             | 72             |
| Class membership probability >80%                       | 4              | 39             | 4              | 59             |
| Class membership probability >90%                       | 0              | 24             | 1              | 42             |

Class 1= Subthreshold depression class; Class 2= Persistent depression class; Class 3=Emerging depression class, Class 4= non-depressed

Posterior classification probabilities show the average estimated probability of being in a class in participants who were classified in a class. For example, the average probability of being classified to class 1, class 2, class 3, and class 4 in those who were classified to class 1 were 61%, 9%, 17%, and 13%, respectively.

Posterior probabilities above a threshold shows the proportion of participants in each class whose probability of being classified to their class was above a threshold. For example, among 42% of those who classified in class 4, the estimated probability of being classified to class 4 was greater than 90%.

**Supplementary Table 5** - Evaluating Criterion validity: Evaluating the role of socio-demographics in predicting group classification membership

| <b>Age</b>                                 | <b>OR</b> | <b>95% CI</b> | <b>p-value</b> |
|--------------------------------------------|-----------|---------------|----------------|
| Subthreshold depression                    | 0.99      | 0.98, 1.00    | 0.005          |
| Persistent depression                      | 0.96      | 0.94, 0.97    | <0.001         |
| Emerging depression                        | 1.01      | 1.00, 1.03    | 0.050          |
| <b>Gender</b>                              |           |               |                |
| <i>Male</i>                                | -         | -             |                |
| Subthreshold depression                    | 0.85      | 0.79, 0.92    | <0.001         |
| Persistent depression                      | 0.73      | 0.64, 0.83    | <0.001         |
| Emerging depression                        | 0.96      | 0.96, 1.10    | 0.6            |
| <b>Living Status</b>                       |           |               |                |
| <i>At home alone in a residential home</i> | -         | -             |                |
| Subthreshold depression                    | 0.92      | 0.85, 1.15    | 0.022          |
| Persistent depression                      | 0.75      | 0.66, 0.95    | <0.001         |
| Emerging depression                        | 1.23      | 1.07, 1.41    | 0.003          |
| <b>Race/ Ethnicity</b>                     |           |               |                |
| <i>White/ Caucasian</i>                    | -         | -             |                |
| Subthreshold depression                    | 0.99      | 0.86, 1.15    | >0.9           |
| Persistent depression                      | 0.93      | 0.73, 1.18    | 0.6            |
| Emerging depression                        | 0.81      | 0.61, 1.08    | 0.2            |
| <b>Education</b>                           |           |               |                |
| <i>&lt;= 12 yrs education</i>              | -         | -             |                |
| Subthreshold depression                    | 0.91      | 0.85, 0.97    | 0.007          |
| Persistent depression                      | 0.79      | 0.70, 0.90    | <0.001         |
| Emerging depression                        | 0.82      | 0.73, 0.93    | 0.002          |
| <b>Smoking status</b>                      |           |               |                |
| <i>Never</i>                               | -         | -             |                |
| <i>Former:</i> Subthreshold depression     | 1.08      | 0.89, 1.30    | 0.4            |
| Persistent depression                      | 0.85      | 0.64, 1.13    | 0.3            |
| Emerging depression                        | 0.89      | 0.64, 1.23    | 0.5            |
| <i>Current:</i> Subthreshold depression    | 0.95      | 0.78, 1.14    | 0.6            |
| Persistent depression                      | 0.71      | 0.54, 0.95    | 0.020          |
| Emerging depression                        | 0.80      | 0.58, 1.10    | 0.2            |
| <b>Alcohol use</b>                         |           |               |                |
| <i>Current</i>                             | -         | -             |                |
| <i>Former:</i> Subthreshold depression     | 0.94      | 0.81, 1.09    | 0.4            |
| Persistent depression                      | 1.25      | 0.99, 1.58    | 0.062          |
| Emerging depression                        | 1.09      | 0.84, 1.42    | 0.5            |
| <i>Never:</i> Subthreshold depression      | 0.79      | 0.72, 0.87    | <0.001         |
| Persistent depression                      | 0.83      | 0.70, 0.98    | 0.031          |
| Emerging depression                        | 0.97      | 0.82, 1.15    | 0.7            |
| <b>Body mass index (BMI) categories</b>    |           |               |                |
| <i>&lt;=25 kg/m<sup>2</sup></i>            | -         | -             | -              |

|                                        |      |             |        |
|----------------------------------------|------|-------------|--------|
| <i>25-30 kg/m<sup>2</sup></i>          |      |             |        |
| Subthreshold depression                | 0.87 | 0.80, 0.95  | 0.002  |
| Persistent depression                  | 0.90 | 0.77, 1.05  | 0.2    |
| Emerging depression                    | 0.91 | 0.78, 1.06  | 0.2    |
| <i>30-35 kg/m<sup>2</sup></i>          |      |             |        |
| Subthreshold depression                | 0.87 | 0.79, 0.97  | 0.010  |
| Persistent depression                  | 0.87 | 0.73, 1.04  | 0.13   |
| Emerging depression                    | 0.92 | 0.76, 1.10  | 0.3    |
| <i>35 or more kg/m<sup>2</sup></i>     |      |             |        |
| Subthreshold depression                | 0.84 | 0.72, 0.97  | 0.016  |
| Persistent depression                  | 0.80 | 0.63, 1.02  | 0.077  |
| Emerging depression                    | 0.87 | 0.67, 1.13  | 0.3    |
| <b>Quality of life scores</b>          |      |             |        |
| <i>Physical component score</i>        |      |             |        |
| Subthreshold depression                | 0.93 | 0.92, 0.93  | <0.001 |
| Persistent depression                  | 0.89 | 0.88, 0.89  | <0.001 |
| Emerging depression                    | 0.96 | 0.95, 0.96  | <0.001 |
| <i>Mental component score</i>          |      |             |        |
| Subthreshold depression                | 0.87 | 0.87, 0.88  | <0.001 |
| Persistent depression MCS              | 0.78 | 0.78, 0.79  | <0.001 |
| Emerging depression MCS                | 0.93 | 0.92, 0.94  | <0.001 |
| <b>Number of medical comorbidities</b> |      |             |        |
| <i>1</i>                               |      |             |        |
| Subthreshold depression                | 0.96 | 0.82, 1.14  | 0.7    |
| Persistent depression                  | 1.16 | 0.82, 1.65  | 0.4    |
| Emerging depression                    | 1.07 | 0.78, 1.46  | 0.7    |
| <i>2</i>                               |      |             |        |
| Subthreshold depression                | 0.95 | 0.81, 1.12  | 0.6    |
| Persistent depression                  | 1.13 | -0.80, 1.58 | 0.5    |
| Emerging depression                    | 1.03 | 0.76, 1.40  | 0.8    |
| <i>3</i>                               |      |             |        |
| Subthreshold depression                | 1.03 | 0.87, 1.22  | 0.7    |
| Persistent depression                  | 1.22 | 0.87, 1.72  | 0.3    |
| Emerging depression                    | 1.15 | 0.84, 1.57  | 0.4    |
| <i>4 or more</i>                       |      |             |        |
| Subthreshold depression                | 1.12 | 0.94, 1.34  | 0.2    |
| Persistent depression                  | 1.36 | 0.95, 1.94  | 0.089  |
| Emerging depression                    | 1.23 | 0.88, 1.71  | 0.2    |
| <b>Polypharmacy</b>                    |      |             |        |
| Subthreshold depression                | 1.13 | 1.03, 1.24  | 0.011  |
| Persistent depression                  | 1.27 | 1.09, 1.47  | 0.002  |
| Emerging depression                    | 1.29 | 1.10, 1.51  | 0.002  |

Footnote: Results from unadjusted multinomial logistic regressions.
